# Supplementary material for: Broadband blue light emissions of one-dimensional hybrid Cu(i) halides with ultrahigh anti -water stability
Source: Royal Society of Chemistry journal article supplement (doi:10.1039/d4dt02072c), 2024-01-01
Supplement: d4dt02072c1.pdf [file d4dt02072c1.pdf]

Supporting information

**Broadband Blue Light Emissions of One-Dimensional  
Hybrid Cu(I) Halides with Ultrahigh Anti-Water  
Stability**

Na Lin,<sup>ab</sup> Yun-Xia Li,<sup>a</sup> Yu Liu,<sup>a</sup> Kai-Qi Sun,<sup>a</sup> Hong-Yan Zhang,<sup>a</sup> Xiao-Wu Lei,<sup>a\*</sup>  
Zhi-Wei Chen<sup>a\*</sup>

<sup>a</sup> Research institute of Optoelectronic Functional Materials, School of Chemistry, Chemical Engineering and Materials, Jining University, Qufu, Shandong, 273155, P. R. China

<sup>b</sup> School of Chemistry and Chemical Engineering, Qufu Normal University, Qufu, Shandong, 273165, P. R. China

*Corresponding Authors:* Zhi-Wei Chen, Xiao-Wu Lei

*E-mail:* zw\_chen@jnxu.edu.cn; xwlei\_jnu@163.com

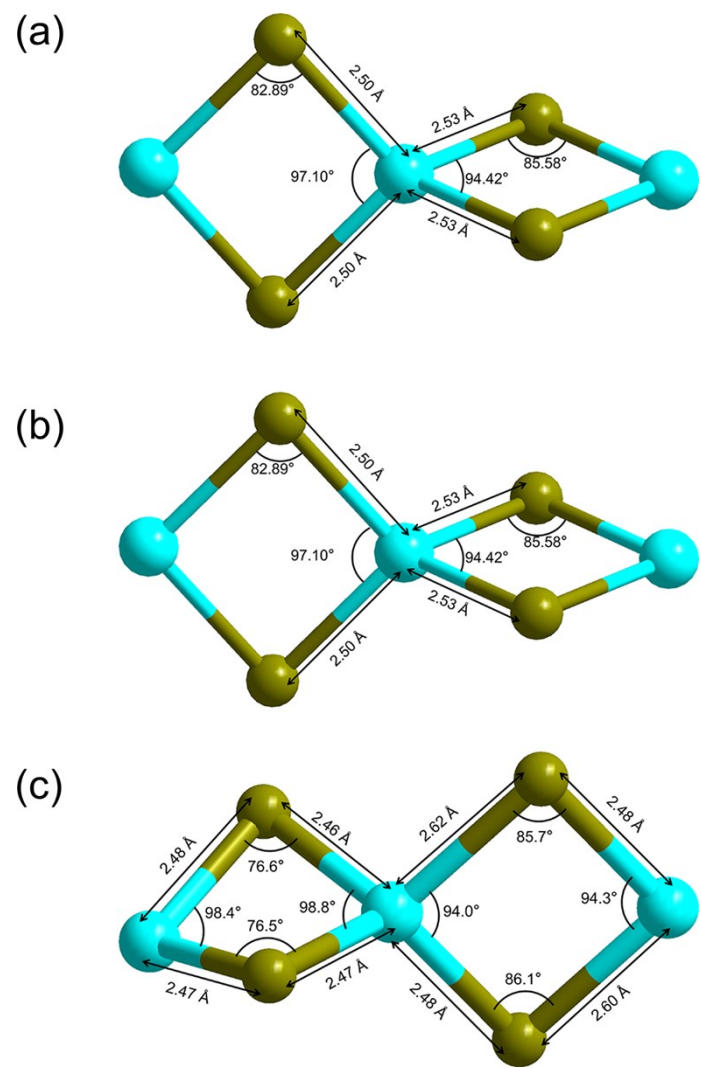

**Fig. S1** The configurations of 1D  $[\text{Cu}_2\text{Br}_4]^{2-}$  chain of (a)  $[(\text{Me})_4\text{-Pipz}]\text{Cu}_2\text{Br}_4$ , (b)  $[\text{BuDA}]\text{Cu}_2\text{Br}_4$  and (c)  $[\text{TMEDA}]\text{Cu}_2\text{Br}_4$ .

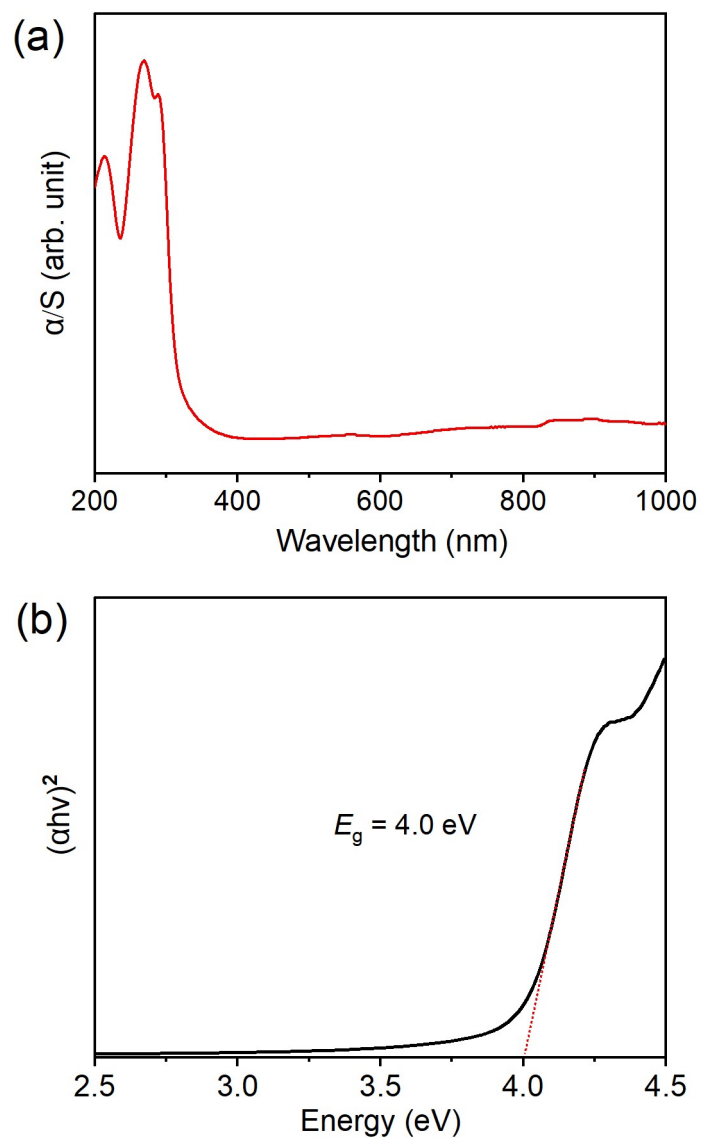

**Fig. S2** The solid state UV-vis adsorption spectrum (a) and Tauc plot for band gap (b) of  $[(\text{Me})_4\text{-Pipz}]\text{Cu}_2\text{Br}_4$ .

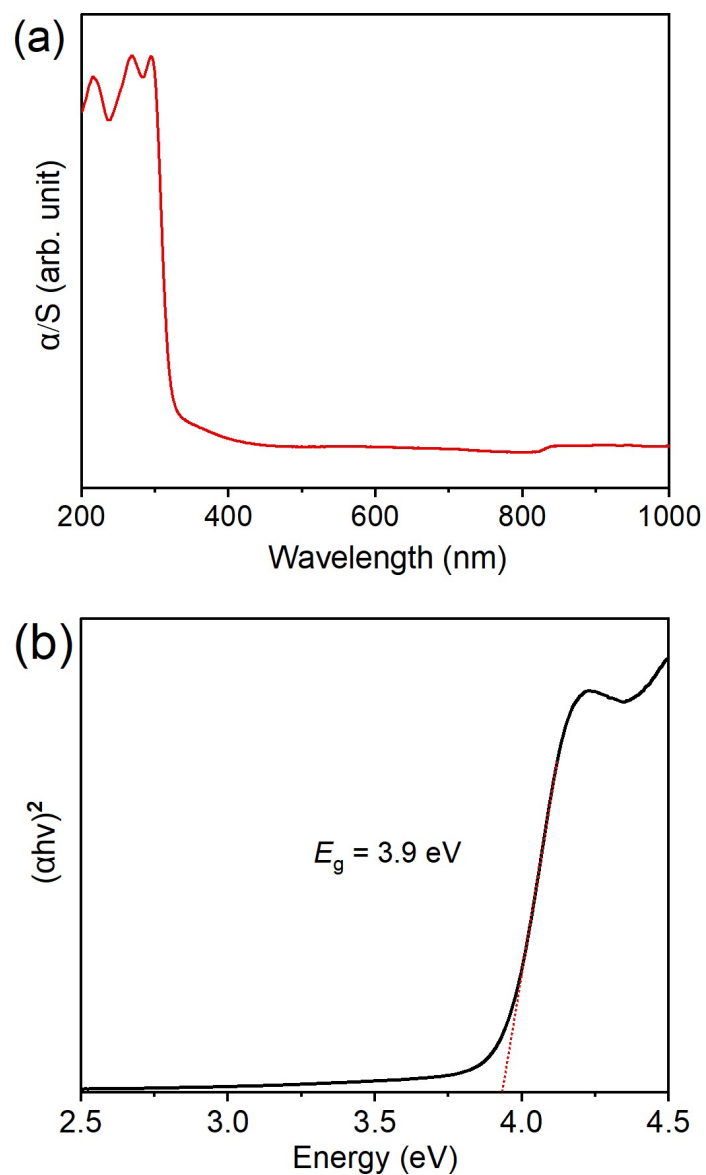

**Fig. S3** The solid state UV-vis adsorption spectrum (a) and Tauc's plot for band gap (b) of [BuDA]Cu<sub>2</sub>Br<sub>4</sub>.

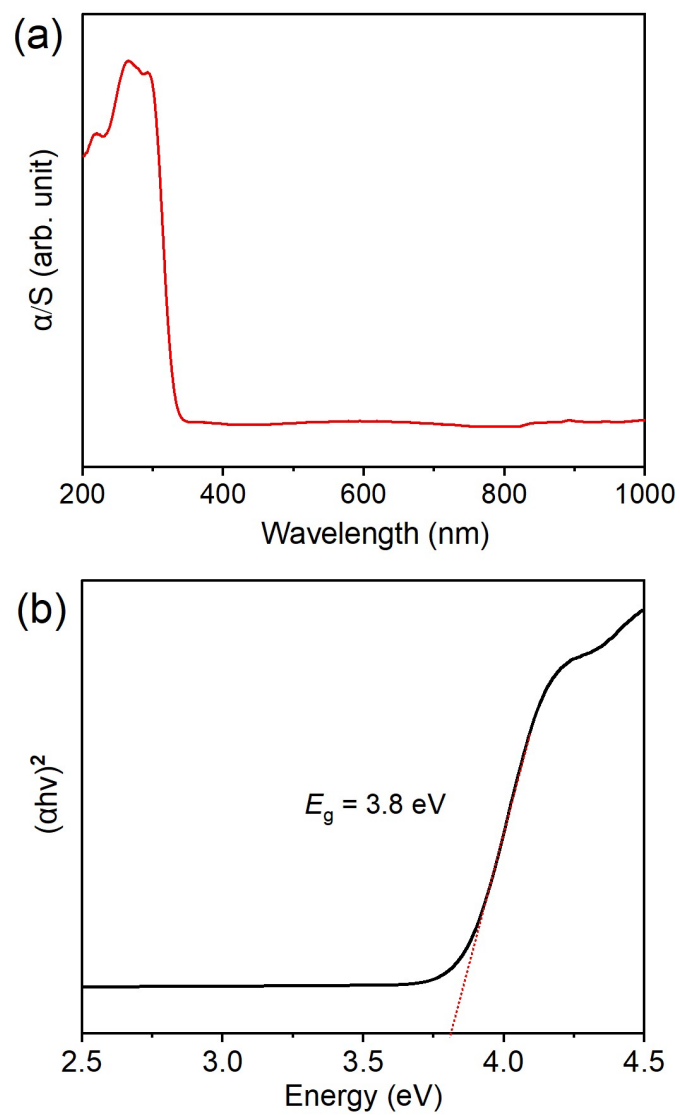

**Fig. S4** The solid state UV-vis adsorption spectrum (a) and Tauc plot for band gap (b) of [TMEDA]Cu<sub>2</sub>Br<sub>4</sub>.

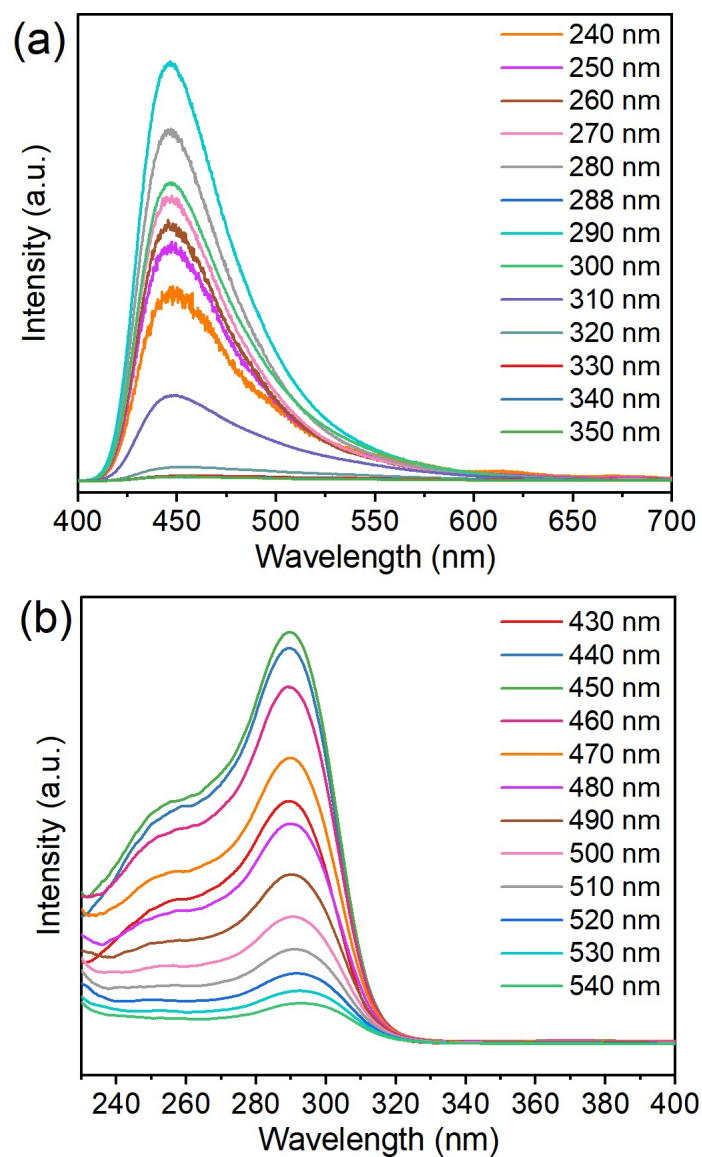

**Fig. S5** (a) The excitation wavelength dependent PL emission spectra, and (b) the emission wavelength dependent PL excitation spectra of  $[(\text{Me})_4\text{-Pipz}]\text{Cu}_2\text{Br}_4$ .

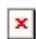

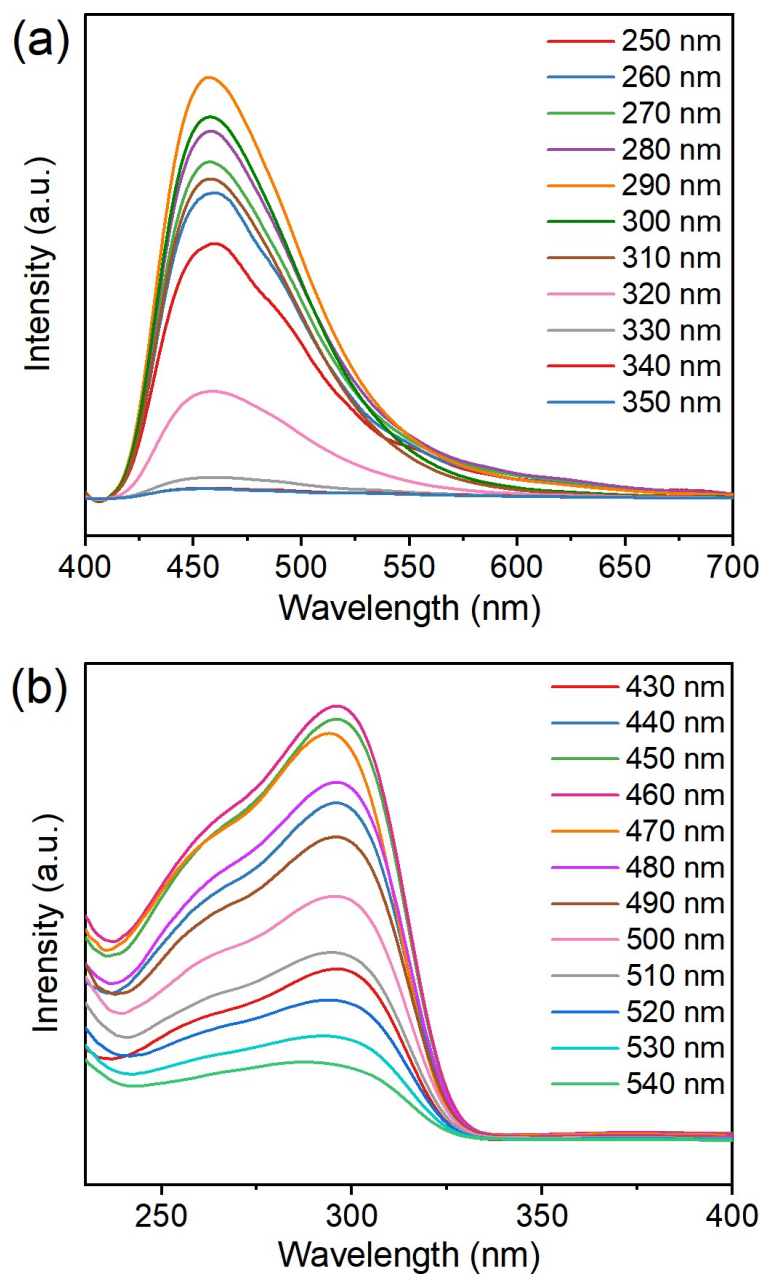

**Fig. S6** (a) The excitation wavelength dependent PL spectra and (b) the emission wavelength dependent PL excitation spectra of [BuDA]Cu<sub>2</sub>Br<sub>4</sub>.

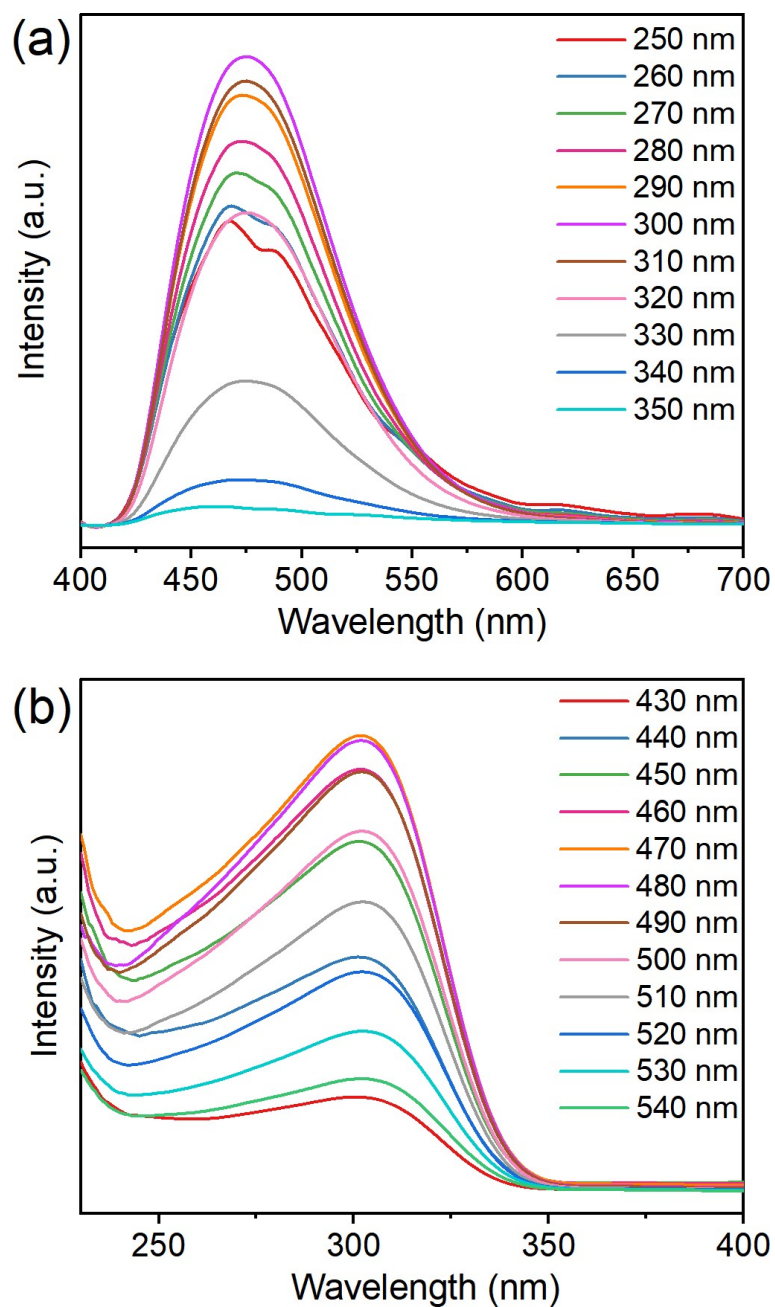

**Fig. S7** (a) The excitation wavelength dependent PL spectra and (b) the emission wavelength dependent PL excitation spectra of [TMEDA]Cu<sub>2</sub>Br<sub>4</sub>.



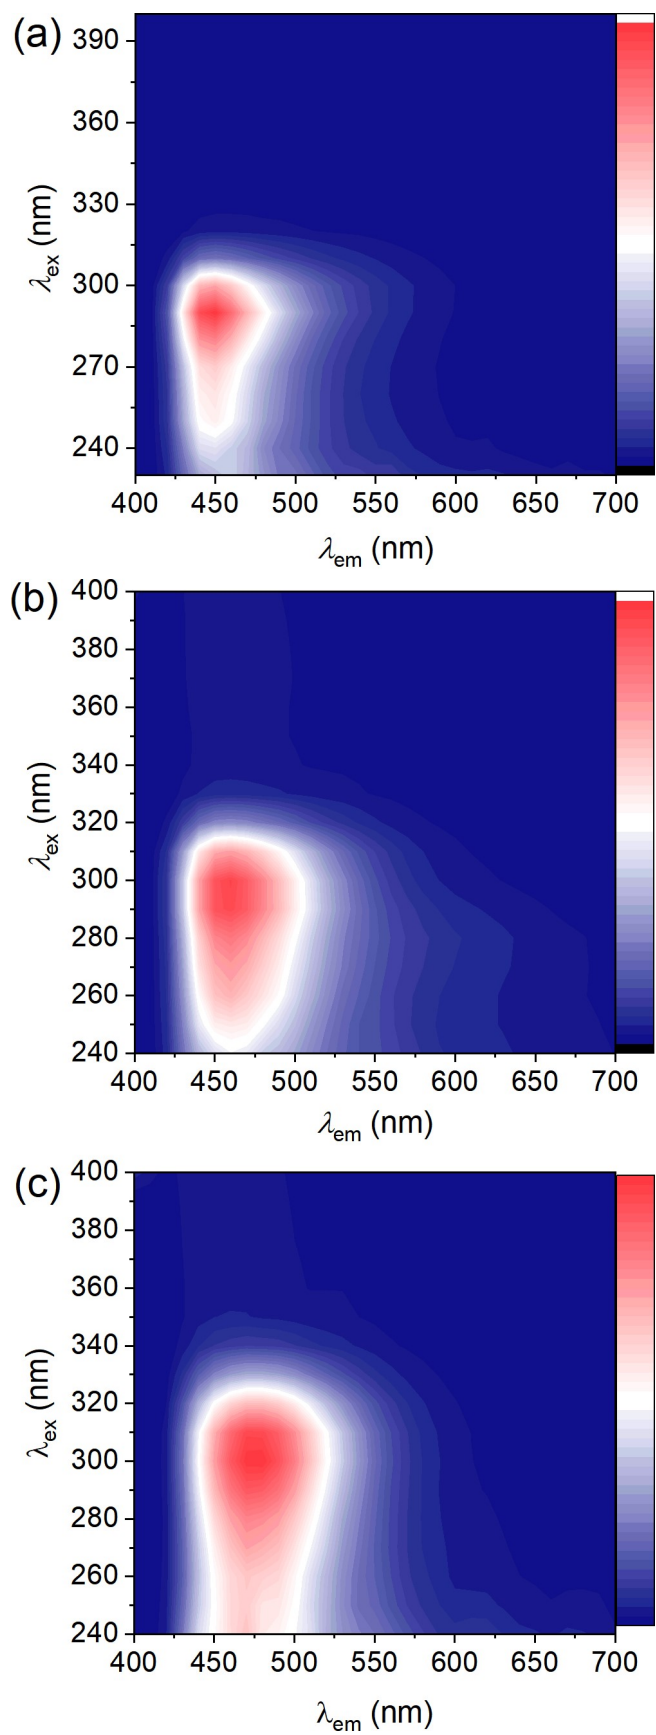

**Fig. S8** 3D consecutive PL excitation and emission correlation maps of (a)  $[(\text{Me})_4\text{Pipz}]\text{Cu}_2\text{Br}_4$ ; (b)  $[\text{BuDA}]\text{Cu}_2\text{Br}_4$  and (c)  $[\text{TMEDA}]\text{Cu}_2\text{Br}_4$ .

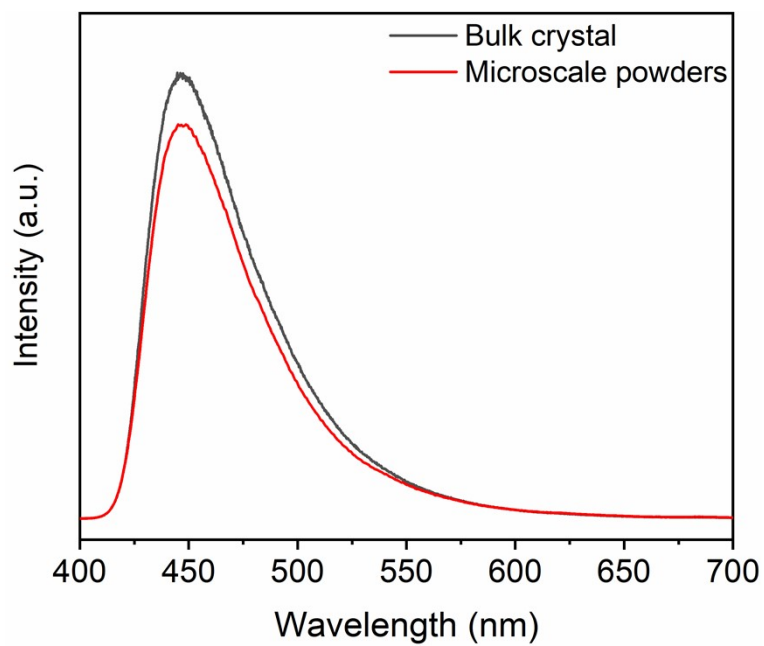

**Fig. S9** Comparison of PL emission spectra of bulk crystals and microscale powders for [(Me)<sub>4</sub>-Pipz]Cu<sub>2</sub>Br<sub>4</sub>.

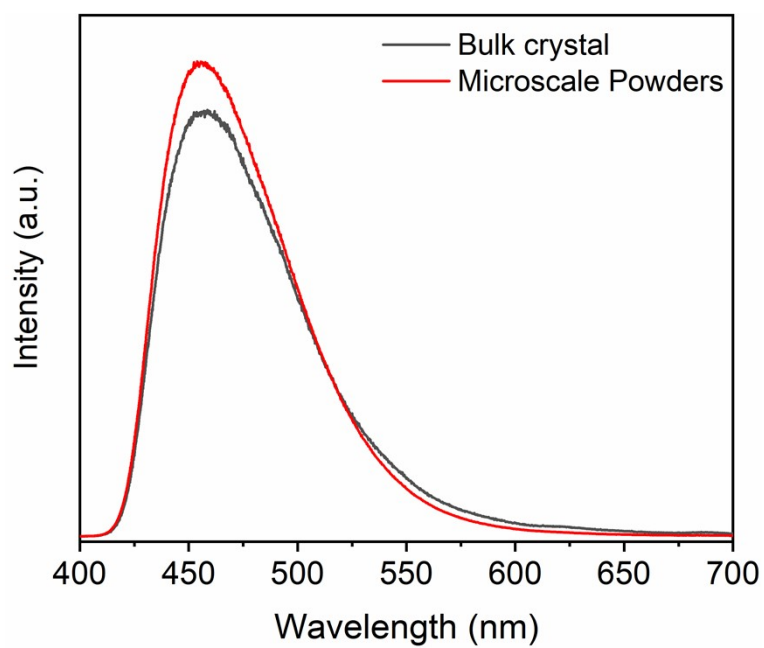

**Fig. S10** Comparison of PL emission spectra of bulk crystals and microscale powders for [BuDA]Cu<sub>2</sub>Br<sub>4</sub>.

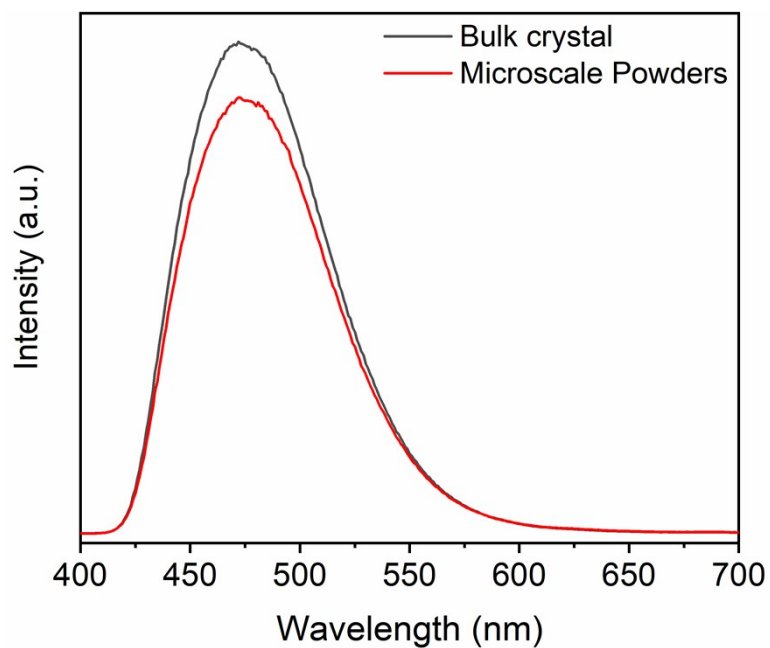

**Fig. S11** Comparison of PL emission spectra of bulk crystals and microscale powders for [TMEDA]Cu<sub>2</sub>Br<sub>4</sub>.

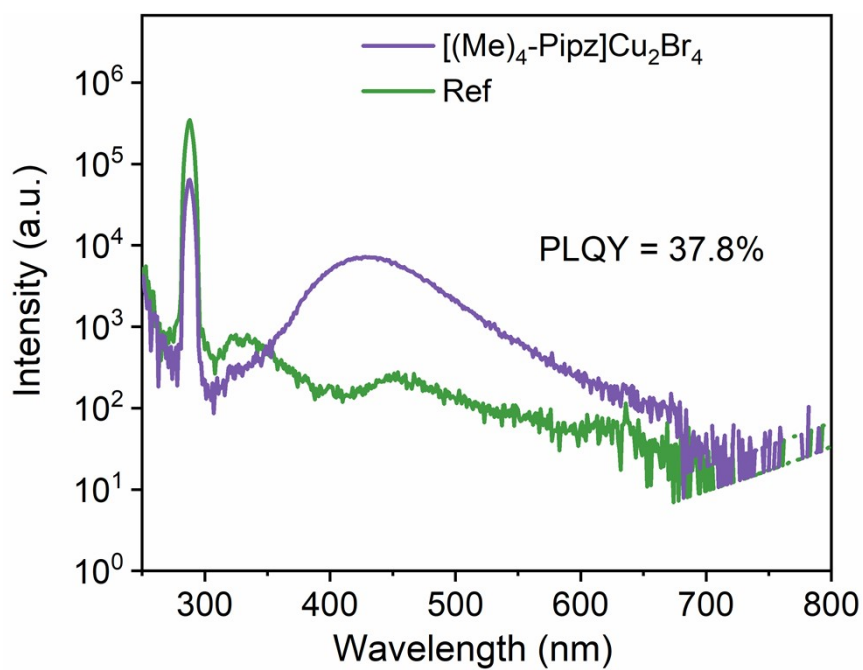

**Fig. S12** The PLQY of [(Me)<sub>4</sub>-Pipz]Cu<sub>2</sub>Br<sub>4</sub>.

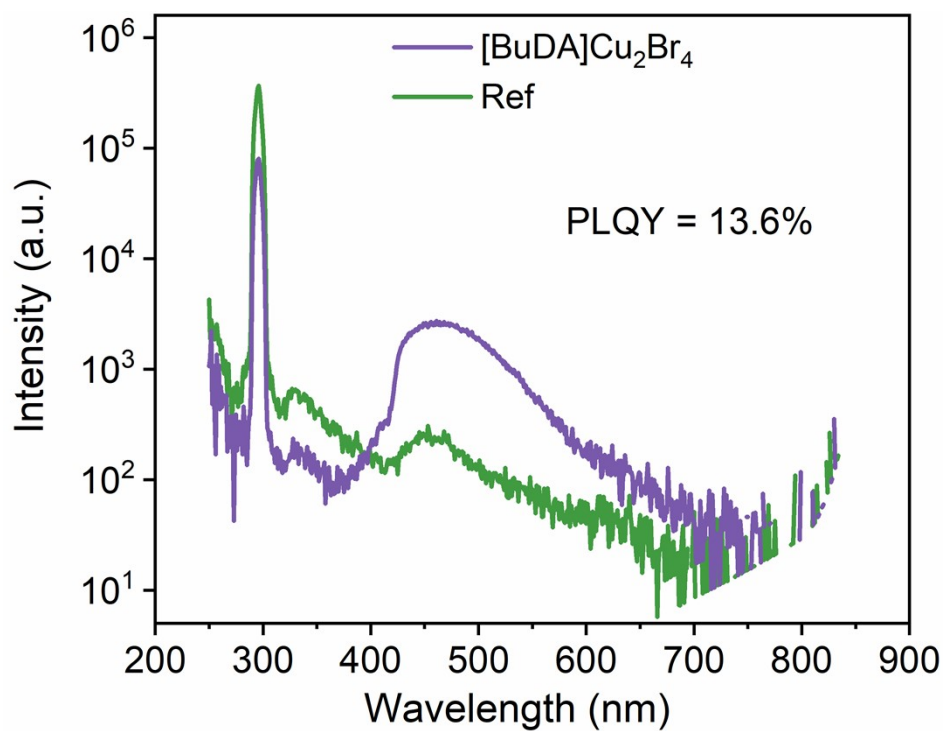

Fig. S13 The PLQY of [BuDA]Cu<sub>2</sub>Br<sub>4</sub>.

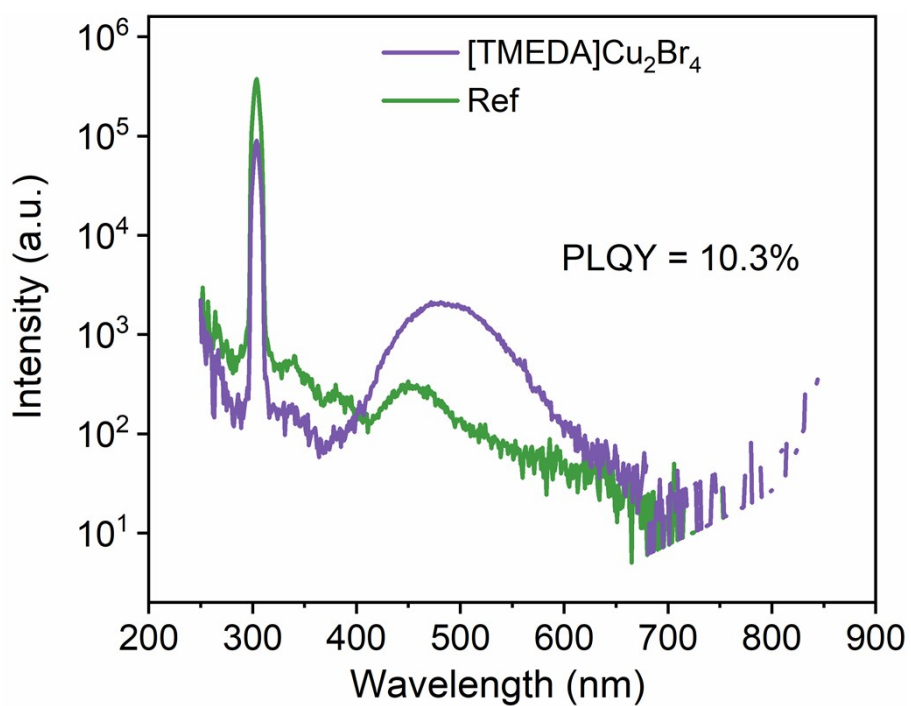

Fig. S14 The PLQY of [TMEDA]Cu<sub>2</sub>Br<sub>4</sub>.

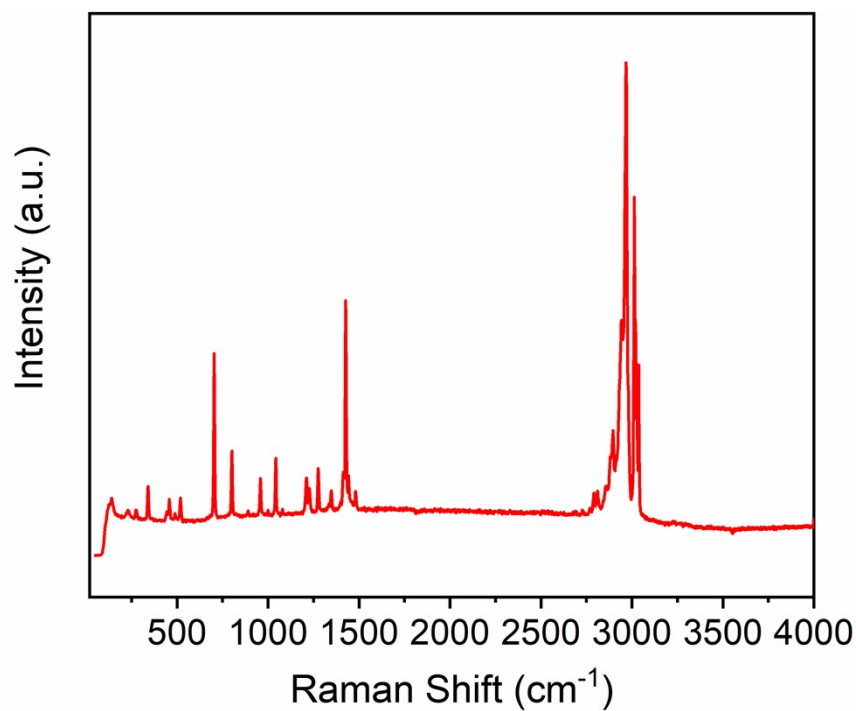

**Fig. S15** Raman spectrum of [(Me)<sub>4</sub>-Pipz]Cu<sub>2</sub>Br<sub>4</sub>.

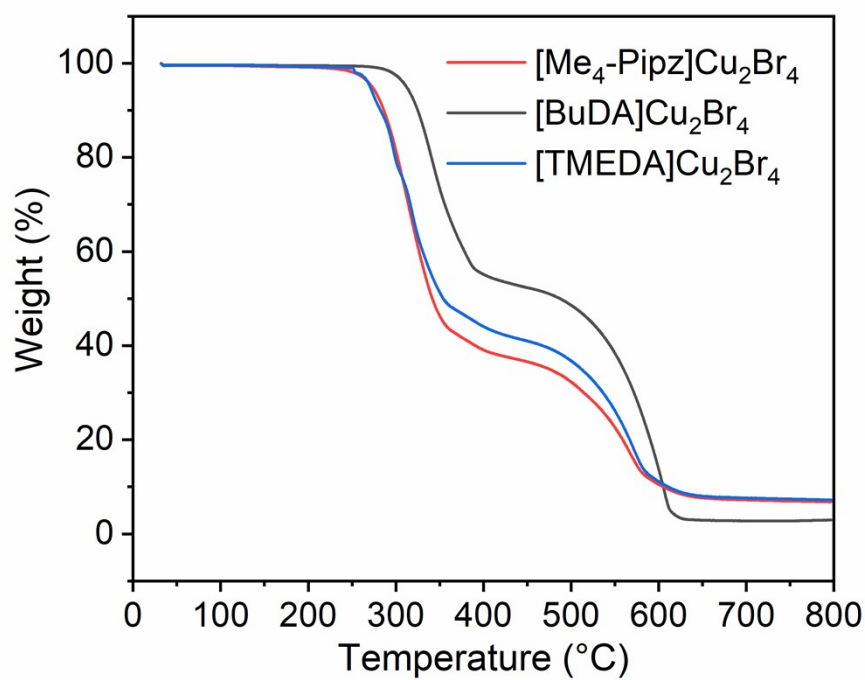

**Fig. S16** The thermogravimetric analysis (TGA) curves of [(Me)<sub>4</sub>-Pipz]Cu<sub>2</sub>Br<sub>4</sub>, [BuDA]Cu<sub>2</sub>Br<sub>4</sub> and [TMEDA]Cu<sub>2</sub>Br<sub>4</sub>.

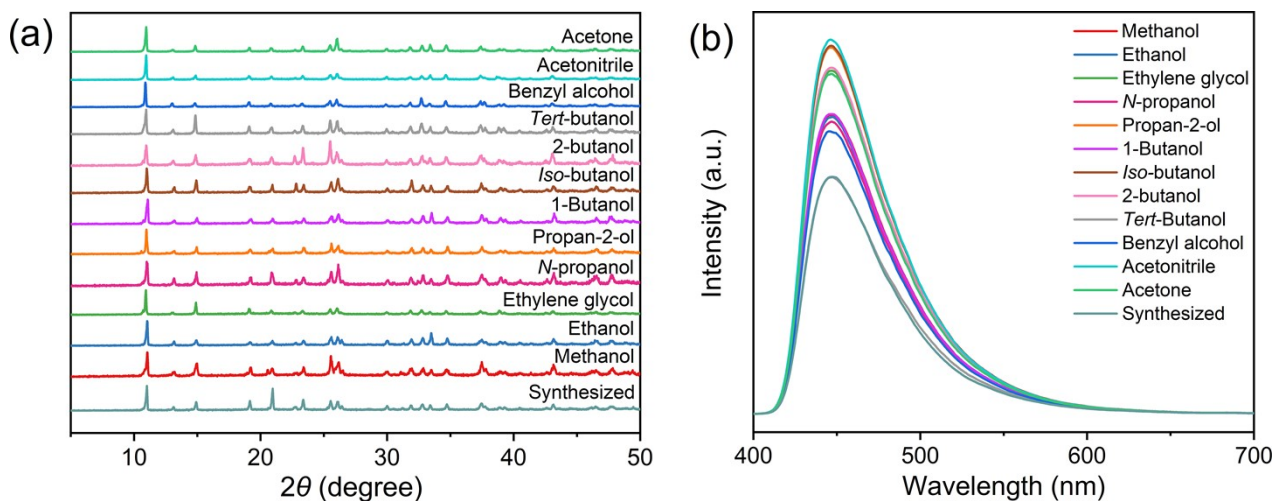

**Fig. S17** PXR D patterns and PL emission spectra of [(Me)<sub>4</sub>-Pipz]Cu<sub>2</sub>Br<sub>4</sub> after immersing in various organic solvents.

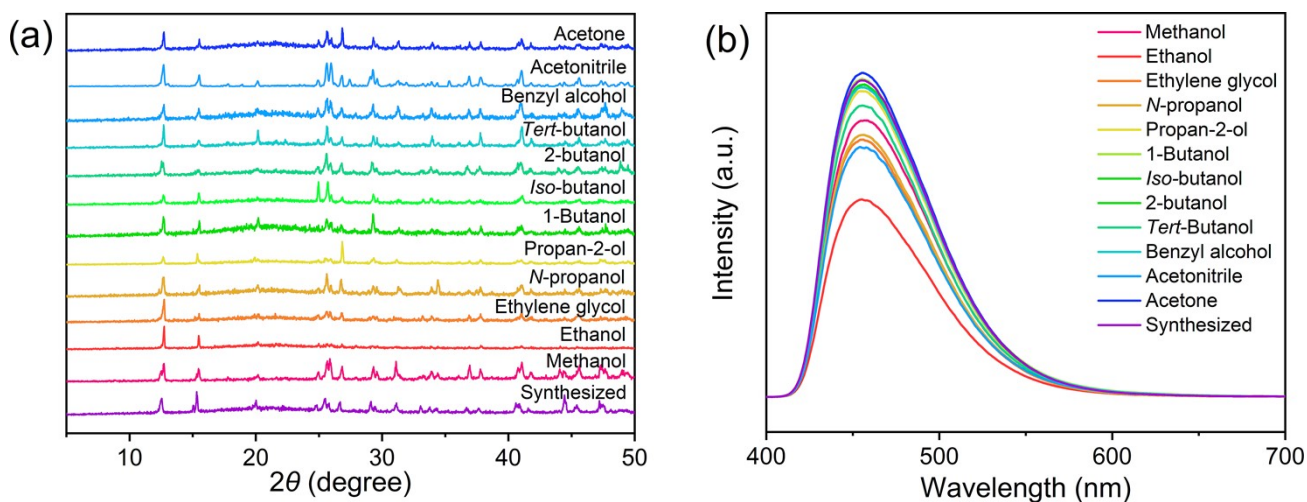

**Fig. S18** PXR D patterns and PL emission spectra of [BuDA]Cu<sub>2</sub>Br<sub>4</sub> after immersing in various organic solvents.

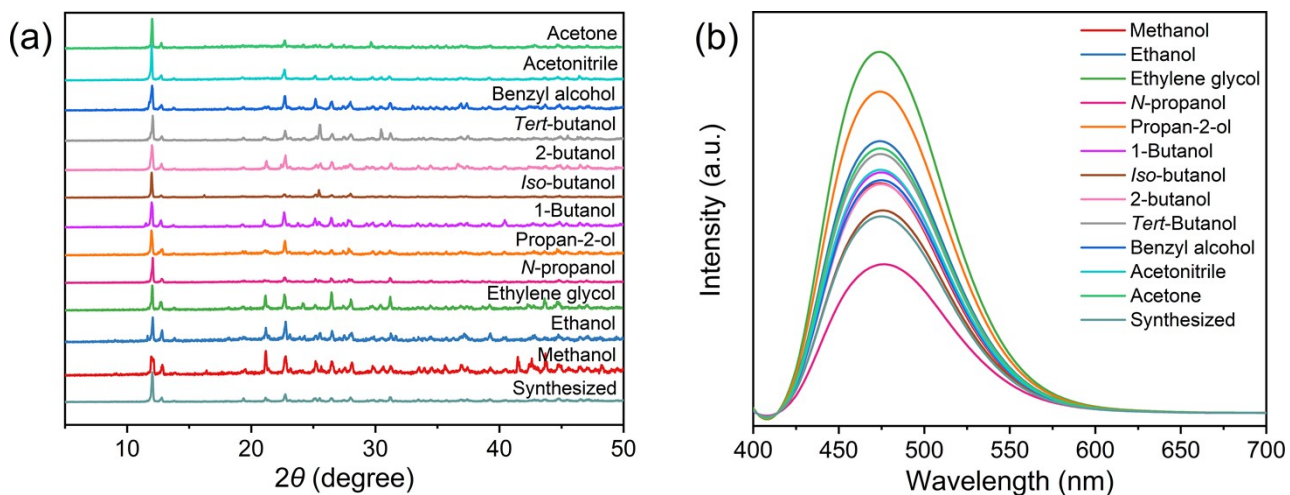

**Fig. S19** PXRD patterns and PL emission spectra of [TMEDA]Cu<sub>2</sub>Br<sub>4</sub> after immersing in various organic solvents.

**Table S1.** Crystal Data and Structural Refinements for [(Me)<sub>4</sub>-Pipz]Cu<sub>2</sub>Br<sub>4</sub>.

| Compound                                                                                 | [(Me) <sub>4</sub> -Pipz]Cu <sub>2</sub> Br <sub>4</sub>                      |
|------------------------------------------------------------------------------------------|-------------------------------------------------------------------------------|
| Chemical formula                                                                         | C <sub>8</sub> N <sub>2</sub> H <sub>20</sub> Cu <sub>2</sub> Br <sub>4</sub> |
| FW                                                                                       | 295.49                                                                        |
| Space group                                                                              | <i>C2/m</i>                                                                   |
| <i>a</i> /Å                                                                              | 13.848(4)                                                                     |
| <i>b</i> /Å                                                                              | 6.7421(19)                                                                    |
| <i>c</i> /Å                                                                              | 9.389(3)                                                                      |
| $\alpha$ /°                                                                              | 90                                                                            |
| $\beta$ /°                                                                               | 121.275(2)                                                                    |
| $\gamma$ /°                                                                              | 90                                                                            |
| <i>V</i> (Å <sup>3</sup> )                                                               | 749.2(4)                                                                      |
| <i>Z</i>                                                                                 | 4                                                                             |
| <i>D</i> <sub>calcd</sub> (g·cm <sup>-3</sup> )                                          | 2.620                                                                         |
| Temp (K)                                                                                 | 296.15                                                                        |
| $\mu$ (mm <sup>-1</sup> )                                                                | 13.481                                                                        |
| <i>F</i> (000)                                                                           | 560.0                                                                         |
| Reflections collected                                                                    | 4263                                                                          |
| Unique reflections                                                                       | 922                                                                           |
| GOF on <i>F</i> <sup>2</sup>                                                             | 1.131                                                                         |
| <sup>a</sup> <i>R</i> <sub>1</sub> , <i>wR</i> <sub>2</sub> ( <i>I</i> > 2σ( <i>I</i> )) | 0.0322/0.0834                                                                 |
| <sup>b</sup> <i>R</i> <sub>1</sub> , <i>wR</i> <sub>2</sub> (all data)                   | 0.0361/0.0852                                                                 |

$${}^a R_1 = \sum ||F_o| - |F_c|| / \sum |F_o|. \quad {}^b wR_2 = [\sum w(F_o^2 - F_c^2)^2 / \sum w(F_o^2)]^{1/2}.$$



**Table S2.** Crystal Data and Structural Refinements for [BuDA]Cu<sub>2</sub>Br<sub>4</sub>.

| Compound                                                                                 | [BuDA]Cu <sub>2</sub> Br <sub>4</sub>                                         |
|------------------------------------------------------------------------------------------|-------------------------------------------------------------------------------|
| Chemical formula                                                                         | C <sub>4</sub> N <sub>2</sub> H <sub>14</sub> Cu <sub>2</sub> Br <sub>4</sub> |
| FW                                                                                       | 268.45                                                                        |
| Space group                                                                              | <i>P</i> 2 <sub>1</sub> / <i>n</i>                                            |
| <i>a</i> /Å                                                                              | 6.0905(3)                                                                     |
| <i>b</i> /Å                                                                              | 8.8163(5)                                                                     |
| <i>c</i> /Å                                                                              | 11.5467(6)                                                                    |
| $\alpha$ /°                                                                              | 90                                                                            |
| $\beta$ /°                                                                               | 97.583(2)                                                                     |
| $\gamma$ /°                                                                              | 90                                                                            |
| <i>V</i> (Å <sup>3</sup> )                                                               | 614.59(6)                                                                     |
| <i>Z</i>                                                                                 | 4                                                                             |
| <i>D</i> <sub>calcd</sub> (g·cm <sup>-3</sup> )                                          | 2.901                                                                         |
| Temp (K)                                                                                 | 273.15                                                                        |
| $\mu$ (mm <sup>-1</sup> )                                                                | 16.419                                                                        |
| <i>F</i> (000)                                                                           | 500.0                                                                         |
| Reflections collected                                                                    | 6960                                                                          |
| Unique reflections                                                                       | 1097                                                                          |
| GOF on <i>F</i> <sup>2</sup>                                                             | 1.044                                                                         |
| <sup>a</sup> <i>R</i> <sub>1</sub> , <i>wR</i> <sub>2</sub> ( <i>I</i> > 2σ( <i>I</i> )) | 0.0236/0.0488                                                                 |
| <sup>b</sup> <i>R</i> <sub>1</sub> , <i>wR</i> <sub>2</sub> (all data)                   | 0.0330/0.0518                                                                 |

$${}^a R_1 = \sum ||F_o| - |F_c|| / \sum |F_o|, \quad {}^b wR_2 = [\sum w(F_o^2 - F_c^2)^2 / \sum w(F_o^2)]^{1/2}.$$

**Table S3.** Crystal Data and Structural Refinements for [TMEDA]Cu<sub>2</sub>Br<sub>4</sub>.

| Compound                                                                                 | [TMEDA]Cu <sub>2</sub> Br <sub>4</sub>                                        |
|------------------------------------------------------------------------------------------|-------------------------------------------------------------------------------|
| Chemical formula                                                                         | C <sub>6</sub> N <sub>2</sub> H <sub>18</sub> Cu <sub>2</sub> Br <sub>4</sub> |
| FW                                                                                       | 564.94                                                                        |
| Space group                                                                              | <i>P</i> 2 <sub>1</sub> / <i>c</i>                                            |
| <i>a</i> /Å                                                                              | 7.8140(7)                                                                     |
| <i>b</i> /Å                                                                              | 14.6335(13)                                                                   |
| <i>c</i> /Å                                                                              | 12.9812(11)                                                                   |
| $\alpha$ /°                                                                              | 90                                                                            |
| $\beta$ /°                                                                               | 93.824(3)                                                                     |
| $\gamma$ /°                                                                              | 90                                                                            |
| <i>V</i> (Å <sup>3</sup> )                                                               | 1481.0(2)                                                                     |
| <i>Z</i>                                                                                 | 4                                                                             |
| <i>D</i> <sub>calcd</sub> (g·cm <sup>-3</sup> )                                          | 2.534                                                                         |
| Temp (K)                                                                                 | 273.15                                                                        |
| $\mu$ (mm <sup>-1</sup> )                                                                | 13.633                                                                        |
| <i>F</i> (000)                                                                           | 1064.0                                                                        |
| Reflections collected                                                                    | 16515                                                                         |
| Unique reflections                                                                       | 2616                                                                          |
| GOF on <i>F</i> <sup>2</sup>                                                             | 1.028                                                                         |
| <sup>a</sup> <i>R</i> <sub>1</sub> , <i>wR</i> <sub>2</sub> ( <i>I</i> > 2σ( <i>I</i> )) | 0.0345/0.0656                                                                 |
| <sup>b</sup> <i>R</i> <sub>1</sub> , <i>wR</i> <sub>2</sub> (all data)                   | 0.0682/0.0762                                                                 |

$${}^a R_1 = \sum ||F_o| - |F_c|| / \sum |F_o|. \quad {}^b wR_2 = [\sum w(F_o^2 - F_c^2)^2 / \sum w(F_o^2)^2]^{1/2}.$$

**Table S4.** Hydrogen bonds data for [(Me)<sub>4</sub>-Pipz]Cu<sub>2</sub>Br<sub>4</sub>.

| D-H...A                  | d(D-H) | d(H...A) | d(D...A) | <(DHA) |
|--------------------------|--------|----------|----------|--------|
| C1-H2...Br2 <sup>1</sup> | 0.96   | 3.03     | 3.772(3) | 135.5  |
| C1-H3...Br2 <sup>2</sup> | 0.96   | 3.19     | 3.862(6) | 128.3  |
| C2-H4...Br1 <sup>3</sup> | 0.96   | 2.89     | 3.804(7) | 159.2  |
| C2-H5...Br1              | 0.96   | 2.83     | 3.765(3) | 164.9  |
| C2-H6...Br1 <sup>4</sup> | 0.96   | 2.89     | 3.765(3) | 152.8  |
| C3-H7...Br2 <sup>5</sup> | 0.97   | 3.18     | 3.808(4) | 124.1  |
| C3-H8...Br2 <sup>6</sup> | 0.97   | 2.97     | 3.633(4) | 126.5  |

<sup>1</sup>1/2+x, 1/2+y, +z; <sup>2</sup>1-x, +y, 1-z; <sup>3</sup>3/2-x, 1/2+y, 2-z; <sup>4</sup>+x, 1+y, +z; <sup>5</sup>1/2+x, -1/2+y, +z; <sup>6</sup>3/2-x, -1/2+y, 2-z
